# Supplementary material for: The dynamics of the conformational changes in the hexopyranose ring: a transition path sampling approach
Source: Royal Society of Chemistry journal article supplement (doi:10.1039/c4ra03410d), 2014-01-01
Supplement: c4ra03410d1.pdf [file c4ra03410d1.pdf]

**Supporting Information**

**The dynamics of the conformational changes in the hexopyranose  
ring: a transition path sampling approach**

Wojciech Plazinski<sup>1</sup> +, Mateusz Drach<sup>2</sup>

<sup>1</sup> *Institute of Catalysis and Surface Chemistry, Polish Academy of Sciences,  
ul. Niezapominajek 8, 30-239 Cracow, Poland*

<sup>2</sup> *Department of Theoretical Chemistry, Faculty of Chemistry, UMCS,  
pl. M. Curie-Skłodowskiej 3, 20-031 Lublin, Poland*

---

+ Corresponding author. Tel.: +48815375685; fax: +48815375685.  
E-mail addresses: wojtek\_plazinski@o2.pl; wojtek@vega.umcs.lublin.pl

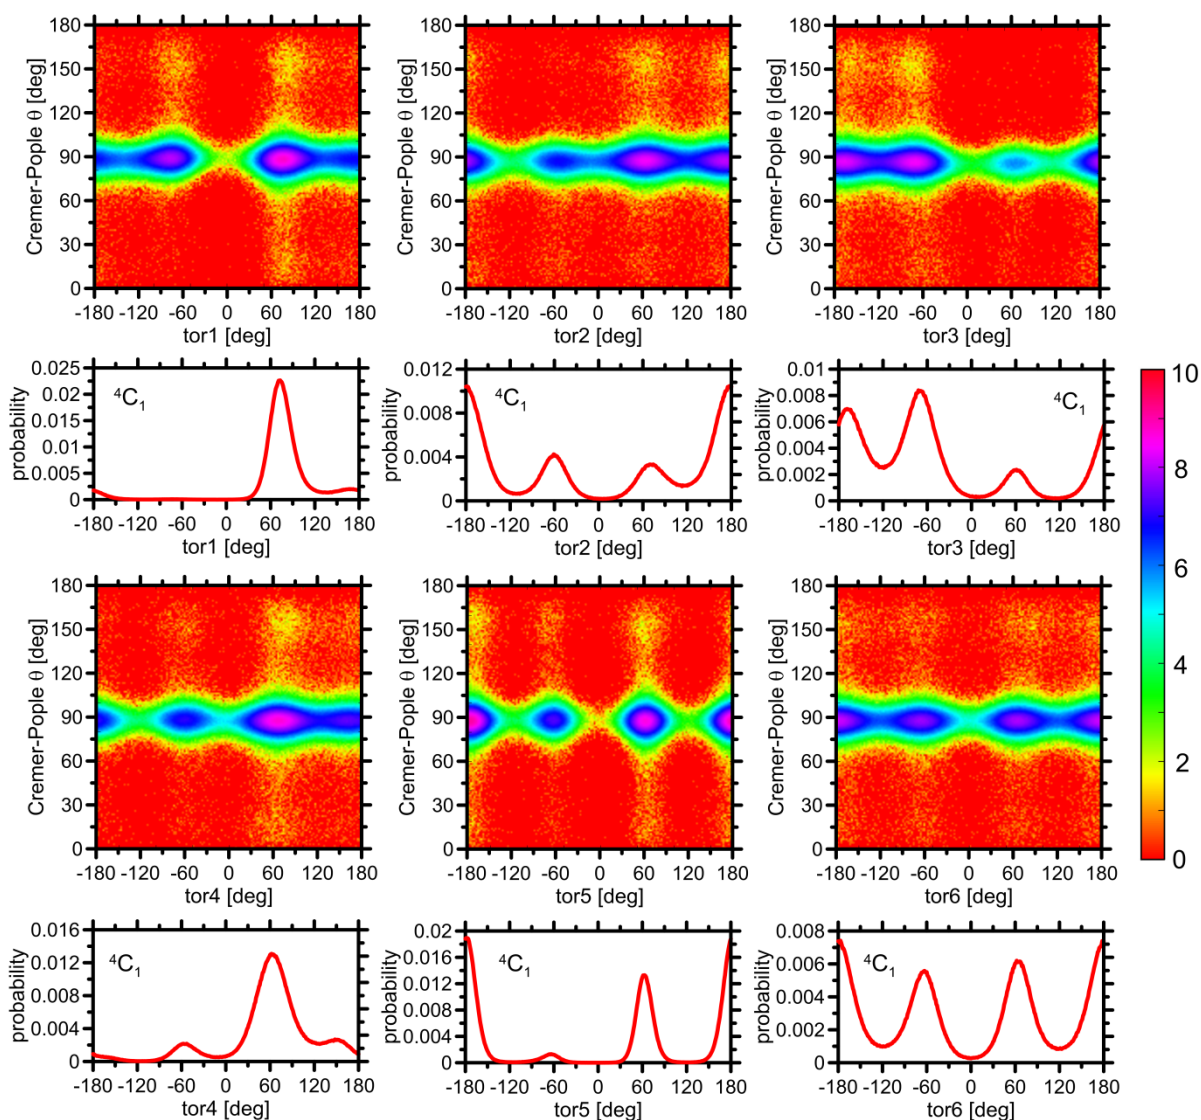

**Fig. S1.** Path density plots obtained from the TPS trajectories and reflecting the orientation of the exocyclic groups (tor1-tor6 dihedral angles in the molecule of GlcA) dependent on the progress of the  ${}^4C_1 \rightarrow {}^1C_4$  transition, expressed as the value of  $\theta$ . The bin dimension was  $2.4 \times 1.2 \text{ deg}^2$  and the scale on the right corresponds to the logarithm of the number of configurations per one bin. Note that not entire phase space is sampled, which results in the lack of data corresponding to the two chair conformers. The tor1-tor6 dihedral angle distributions obtained during unbiased MD simulations and representing the  ${}^4C_1$  conformation are given as line plots. Further details are given in the main manuscript.

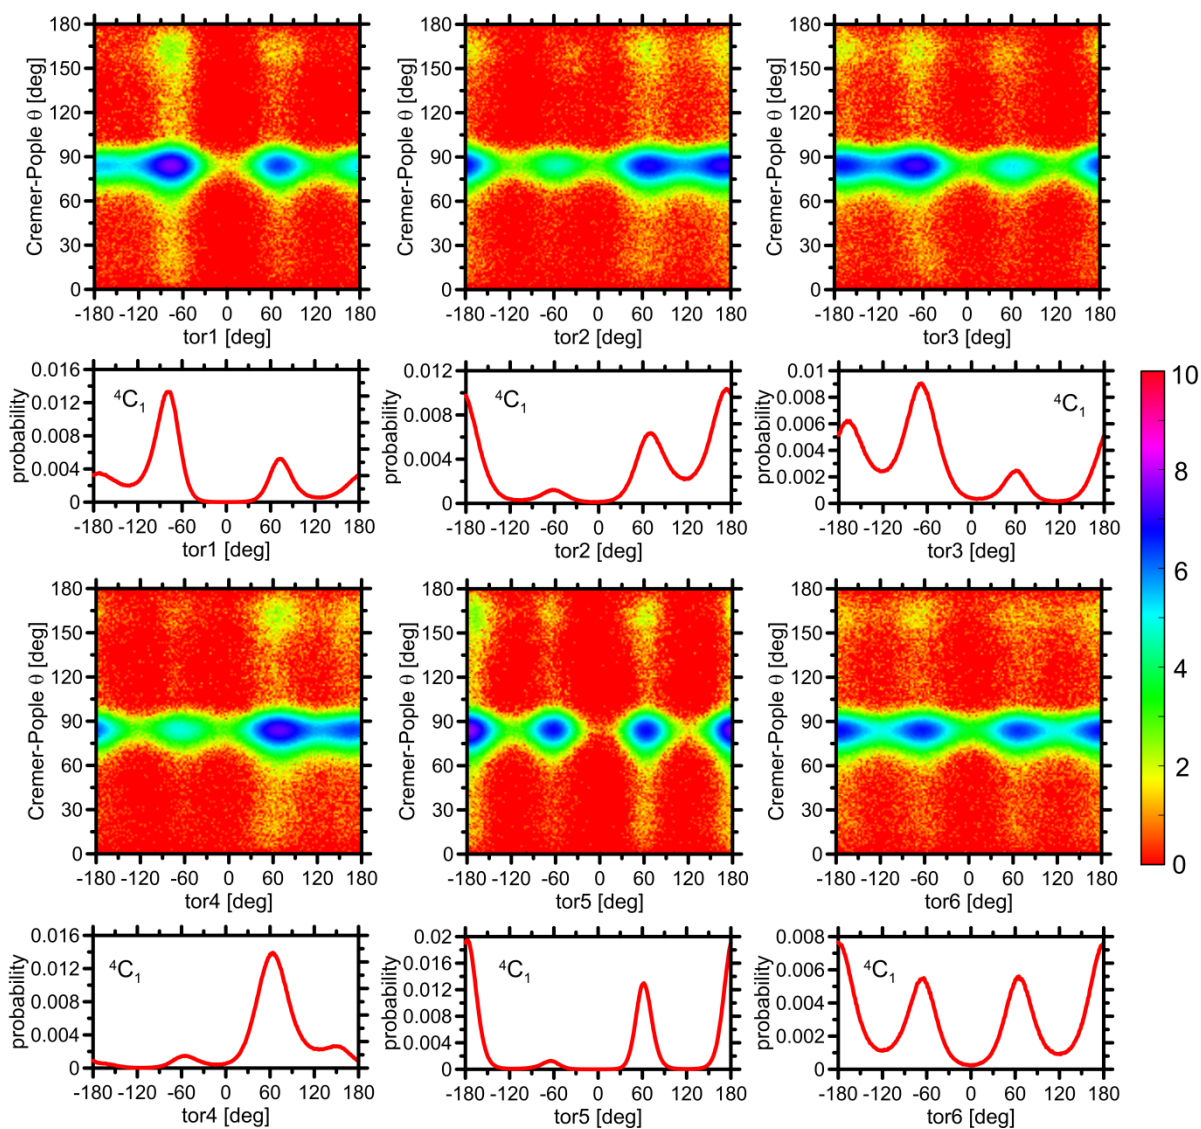

**Fig. S2.** Path density plots obtained from the TPS trajectories and reflecting the orientation of the exocyclic groups (tor1-tor6 dihedral angles in the molecule of GlcA) dependent on the progress of the  ${}^4C_1 \rightarrow {}^1C_4$  transition, expressed as the value of  $\theta$ . The rest of the details as in Fig. S1.

**The coordinates of the four structures identified as transition states of GlcA (PDB data):**

```
TITLE      Generated by trjconv : UNNAMED in water t= 8.00000
REMARK     THIS IS A SIMULATION BOX
CRYST1    30.145  30.145  30.145  90.00  90.00  90.00 P 1
1
MODEL      1
ATOM       1  C4  GLC  1      12.400  23.130  16.640  1.00  0.00
ATOM       2  O4  GLC  1      11.090  23.640  16.380  1.00  0.00
ATOM       3  HO4 GLC  1      10.380  23.030  16.760  1.00  0.00
ATOM       4  C3  GLC  1      13.530  23.170  15.620  1.00  0.00
ATOM       5  O3  GLC  1      13.600  21.930  14.900  1.00  0.00
ATOM       6  HO3 GLC  1      13.960  21.960  13.970  1.00  0.00
ATOM       7  C2  GLC  1      14.910  23.600  16.080  1.00  0.00
ATOM       8  O2  GLC  1      14.970  25.020  15.850  1.00  0.00
ATOM       9  HO2 GLC  1      15.840  25.450  16.070  1.00  0.00
ATOM      10  C6  GLC  1      12.240  22.460  19.040  1.00  0.00
ATOM      11  O6  GLC  1      12.810  21.140  19.030  1.00  0.00
ATOM      12  HO6 GLC  1      12.220  20.470  18.600  1.00  0.00
ATOM      13  C5  GLC  1      12.830  23.460  18.060  1.00  0.00
ATOM      14  O5  GLC  1      14.190  23.750  18.420  1.00  0.00
ATOM      15  C1  GLC  1      15.100  23.110  17.510  1.00  0.00
ATOM      16  O1  GLC  1      16.410  23.470  17.960  1.00  0.00
ATOM      17  HO1 GLC  1      16.540  24.460  17.880  1.00  0.00
```

```
TITLE      Generated by trjconv : UNNAMED in water t= 657.29999
REMARK     THIS IS A SIMULATION BOX
CRYST1    30.100  30.100  30.100  90.00  90.00  90.00 P 1
1
MODEL      1
ATOM       1  C4  GLC  1      13.750  17.560  19.870  1.00  0.00
ATOM       2  O4  GLC  1      14.160  17.100  18.580  1.00  0.00
ATOM       3  HO4 GLC  1      14.010  16.130  18.420  1.00  0.00
ATOM       4  C3  GLC  1      14.510  18.790  20.340  1.00  0.00
ATOM       5  O3  GLC  1      14.680  19.170  21.720  1.00  0.00
ATOM       6  HO3 GLC  1      15.540  19.650  21.900  1.00  0.00
ATOM       7  C2  GLC  1      13.900  20.040  19.740  1.00  0.00
ATOM       8  O2  GLC  1      13.930  20.180  18.310  1.00  0.00
ATOM       9  HO2 GLC  1      14.730  20.700  18.040  1.00  0.00
ATOM      10  C6  GLC  1      11.780  16.480  20.430  1.00  0.00
ATOM      11  O6  GLC  1      10.350  16.450  20.580  1.00  0.00
ATOM      12  HO6 GLC  1      10.070  17.010  21.370  1.00  0.00
ATOM      13  C5  GLC  1      12.260  17.850  19.960  1.00  0.00
ATOM      14  O5  GLC  1      11.720  19.050  20.540  1.00  0.00
ATOM      15  C1  GLC  1      12.510  20.220  20.320  1.00  0.00
ATOM      16  O1  GLC  1      11.610  21.160  19.710  1.00  0.00
ATOM      17  HO1 GLC  1      11.330  21.850  20.370  1.00  0.00
```

```
TITLE      Generated by trjconv : UNNAMED in water t= 162.10001
REMARK     THIS IS A SIMULATION BOX
CRYST1    30.154  30.154  30.154  90.00  90.00  90.00 P 1
1
```

|       |    |     |     |   |        |        |        |           |
|-------|----|-----|-----|---|--------|--------|--------|-----------|
| MODEL | 1  |     |     |   |        |        |        |           |
| ATOM  | 1  | C4  | GLC | 1 | 11.220 | 20.120 | 19.050 | 1.00 0.00 |
| ATOM  | 2  | O4  | GLC | 1 | 11.960 | 21.340 | 18.910 | 1.00 0.00 |
| ATOM  | 3  | HO4 | GLC | 1 | 12.160 | 21.490 | 17.940 | 1.00 0.00 |
| ATOM  | 4  | C3  | GLC | 1 | 12.040 | 18.870 | 19.270 | 1.00 0.00 |
| ATOM  | 5  | O3  | GLC | 1 | 11.750 | 17.760 | 18.410 | 1.00 0.00 |
| ATOM  | 6  | HO3 | GLC | 1 | 11.740 | 18.000 | 17.440 | 1.00 0.00 |
| ATOM  | 7  | C2  | GLC | 1 | 12.130 | 18.390 | 20.710 | 1.00 0.00 |
| ATOM  | 8  | O2  | GLC | 1 | 12.930 | 19.240 | 21.550 | 1.00 0.00 |
| ATOM  | 9  | HO2 | GLC | 1 | 13.190 | 18.730 | 22.370 | 1.00 0.00 |
| ATOM  | 10 | C6  | GLC | 1 | 8.960  | 20.910 | 19.430 | 1.00 0.00 |
| ATOM  | 11 | O6  | GLC | 1 | 7.940  | 21.340 | 20.350 | 1.00 0.00 |
| ATOM  | 12 | HO6 | GLC | 1 | 7.710  | 20.550 | 20.920 | 1.00 0.00 |
| ATOM  | 13 | C5  | GLC | 1 | 10.180 | 20.350 | 20.140 | 1.00 0.00 |
| ATOM  | 14 | O5  | GLC | 1 | 9.810  | 19.360 | 21.110 | 1.00 0.00 |
| ATOM  | 15 | C1  | GLC | 1 | 10.660 | 18.210 | 21.080 | 1.00 0.00 |
| ATOM  | 16 | O1  | GLC | 1 | 10.560 | 17.510 | 22.330 | 1.00 0.00 |
| ATOM  | 17 | HO1 | GLC | 1 | 9.640  | 17.270 | 22.640 | 1.00 0.00 |

TITLE           Generated by trjconv : UNNAMED in water t= 389.20001  
REMARK           THIS IS A SIMULATION BOX  
CRYST1   30.149   30.149   30.149   90.00   90.00   90.00 P 1  
1

|       |    |     |     |   |        |        |        |           |
|-------|----|-----|-----|---|--------|--------|--------|-----------|
| MODEL | 1  |     |     |   |        |        |        |           |
| ATOM  | 1  | C4  | GLC | 1 | 18.440 | 16.170 | 13.780 | 1.00 0.00 |
| ATOM  | 2  | O4  | GLC | 1 | 19.090 | 16.760 | 14.920 | 1.00 0.00 |
| ATOM  | 3  | HO4 | GLC | 1 | 19.330 | 17.670 | 14.560 | 1.00 0.00 |
| ATOM  | 4  | C3  | GLC | 1 | 18.050 | 14.740 | 14.110 | 1.00 0.00 |
| ATOM  | 5  | O3  | GLC | 1 | 17.820 | 13.950 | 12.930 | 1.00 0.00 |
| ATOM  | 6  | HO3 | GLC | 1 | 18.650 | 13.760 | 12.420 | 1.00 0.00 |
| ATOM  | 7  | C2  | GLC | 1 | 16.870 | 14.490 | 15.030 | 1.00 0.00 |
| ATOM  | 8  | O2  | GLC | 1 | 17.230 | 14.420 | 16.420 | 1.00 0.00 |
| ATOM  | 9  | HO2 | GLC | 1 | 17.320 | 13.470 | 16.720 | 1.00 0.00 |
| ATOM  | 10 | C6  | GLC | 1 | 17.280 | 17.130 | 11.860 | 1.00 0.00 |
| ATOM  | 11 | O6  | GLC | 1 | 18.620 | 17.380 | 11.430 | 1.00 0.00 |
| ATOM  | 12 | HO6 | GLC | 1 | 18.650 | 17.330 | 10.430 | 1.00 0.00 |
| ATOM  | 13 | C5  | GLC | 1 | 17.170 | 16.900 | 13.360 | 1.00 0.00 |
| ATOM  | 14 | O5  | GLC | 1 | 15.890 | 16.310 | 13.630 | 1.00 0.00 |
| ATOM  | 15 | C1  | GLC | 1 | 15.680 | 15.360 | 14.680 | 1.00 0.00 |
| ATOM  | 16 | O1  | GLC | 1 | 15.200 | 16.110 | 15.810 | 1.00 0.00 |
| ATOM  | 17 | HO1 | GLC | 1 | 15.030 | 15.350 | 16.440 | 1.00 0.00 |
